# Supplementary material
Source: PubMed Central journal article supplement (PMC8975720)
Supplement: giac007_response_to_reviewer_comments_revision_2.pdf [file giac007_response_to_reviewer_comments_revision_2.pdf]

not distance computation, makes up a larger part of the compute time for larger genomes.

We agree that Levin distance the more biologically relevant measure of efficiency but think that for most users designing guides per gene and working on smaller genomes the data supports the conclusion that Hamming is an appropriate distance approximation.

In the last revision we added Levin distance as an option for users who need it. We discuss the results in lines 233-242.

We have also added Supplementary Table 2 which summarizes the runtime to compute all guides for the PAMs "NGG", "NNAGAAW" and "NNAGAAW" in the Homo sapiens (GRCh38.p13) genome. We added this benchmark for the large community of human researchers.

We have made additional improvements to the bibliography and abbreviation sections.

Sincerely,

Adam Rivers

Close
