# Supplementary material
Source: PubMed Central journal article supplement (PMC8975720)
Supplement: giac007_reviewer_3_report_original_submission.pdf [file giac007_reviewer_3_report_original_submission.pdf]

## Reviewer Report

**Title: GuideMaker: Software to design CRISPR-Cas guide RNA pools in non-model genomes**

**Version: Original Submission**    **Date: 7/29/2021**

**Reviewer name: Mudra Hegde**

### Reviewer Comments to Author:

#### Summary:

In this manuscript, Poudel et al. present a software, GuideMaker, to rapidly design sgRNAs targeting non-model genomes. Various input parameters such as PAM motif, guide length, length of seed region for off-target searching and so on can be toggled to design a panel of sgRNAs for pooled screening projects. The tool also helps pick control sgRNAs to include in the sgRNA pool. To benchmark the computational performance of their tool, the authors used GuideMaker to design sgRNAs targeting *E.coli*, *P.aeruginosa*, *Aspergillus fumigatus* and *Arabidopsis thaliana*. They also compared GuideMaker to the existing design tool, CHOPCHOP and reported that the targets identified by GuideMaker were mostly similar to those identified by CHOPCHOP. This tool can be used as a stand-alone web application, command-line software or in the CyVerse Discovery Environment.

Overall, the tool is very well documented and easy to use. In the current version of the manuscript, GuideMaker does not show a clear improvement over the state-of-the-art design tool, CHOPCHOP. The authors do not implement any existing on-target scoring methods to determine the targeting efficacy of the picked sgRNAs. This can lead to picking guides that are highly specific but not effective enough.

#### Major points:

1. Implementing on-target scoring methods, at least for the Cas enzymes that have on-target efficacy information, can help improve the process of picking sgRNAs. This tool will probably be used more often with standard Cas enzymes and it will be useful to have on-target efficacy scores attached to the guide RNAs.
2. The authors do a thorough analysis of the computational performance of GuideMaker with various genomes and Cas enzymes but including a comparison of the computational performance of GuideMaker vs. CHOPCHOP will strengthen the manuscript.
3. The authors define the PAM sequence of SaCas9 to be NGRRT whereas the canonical PAM sequence of SaCas9 is NNGRRT. This should be modified throughout the manuscript and analyses involving SaCas9 should be redone.
4. A good addition to the tool would be to output a file with all the sequences that were designed targeting the region of interest with the specific PAM sequence. This gives the user a sense of the universe from which the final guides were picked.
5. Another useful input parameter would be to specify a target region that the user wants to focus on such as letting the user input genomic coordinates or a gene name or locus tag. For example, CRISPy by Blin et al., 2016 takes a GenBank file as input and allows the user to input features specific to the uploaded genome.

#### Minor points:

1. "CyVerse" is misspelled as "CyCVerse" in multiple places in the manuscript.
2. Reference Figure 2 in Line 92.
3. Line 154: "Ratios between tools were calculated by dividing the number of gRNA identified.."
4. In Supplementary Figure 3 "wit haVX2" should be "with aVX2".
5. GitHub link in Line 336 does not work.
6. Line 225-226: "GuideMaker also creates off-target gRNAs for use as negative controls in high-throughput experiments." "Off-target gRNAs" is misleading in this context.

### **Level of Interest**

Please indicate how interesting you found the manuscript: Choose an item.

### **Quality of Written English**

Please indicate the quality of language in the manuscript: Choose an item.

### **Declaration of Competing Interests**

Please complete a declaration of competing interests, considering the following questions:

- Have you in the past five years received reimbursements, fees, funding, or salary from an organisation that may in any way gain or lose financially from the publication of this manuscript, either now or in the future?
- Do you hold any stocks or shares in an organisation that may in any way gain or lose financially from the publication of this manuscript, either now or in the future?
- Do you hold or are you currently applying for any patents relating to the content of the manuscript?
- Have you received reimbursements, fees, funding, or salary from an organization that holds or has applied for patents relating to the content of the manuscript?
- Do you have any other financial competing interests?
- Do you have any non-financial competing interests in relation to this paper?

If you can answer no to all of the above, write 'I declare that I have no competing interests' below. If your reply is yes to any, please give details below.

I declare that I have no competing interests

I agree to the open peer review policy of the journal. I understand that my name will be included on my report to the authors and, if the manuscript is accepted for publication, my named report including any attachments I upload will be posted on the website along with the authors' responses. I agree for my report to be made available under an Open Access Creative Commons CC-BY license

(<http://creativecommons.org/licenses/by/4.0/>). I understand that any comments which I do not wish to be included in my named report can be included as confidential comments to the editors, which will not be published.

Choose an item.

To further support our reviewers, we have joined with Publons, where you can gain additional credit to further highlight your hard work (see: <https://publons.com/journal/530/gigascience>). On publication of this paper, your review will be automatically added to Publons, you can then choose whether or not to claim your Publons credit. I understand this statement.

Yes Choose an item.
